# Supplementary material for: Longitudinal Modulation of Loco-Regional Immunity in Ovarian Cancer Patients Receiving Intraperitoneal Chemotherapy
Source: MDPI journal article supplement (doi:10.3390/cancers14225647), 2022-11-17

**Supplemental Table S1** IP fluid DE genes between early and late time points (p<0.05)

| Gene    | log2FC | p-value  | q-value | Gene    | log2FC | p-value | q-value | Gene     | log2FC | p-value | q-value |
|---------|--------|----------|---------|---------|--------|---------|---------|----------|--------|---------|---------|
| SELE    | 4.165  | 1.26E-03 | 0.163   | RRAD    | 2.219  | 0.014   | 0.180   | IL7      | 2.162  | 0.029   | 0.196   |
| CD70    | 3.637  | 1.56E-03 | 0.163   | IL22RA2 | 2.567  | 0.014   | 0.180   | TLR2     | 0.961  | 0.029   | 0.196   |
| IL1R2   | 2.655  | 1.70E-03 | 0.163   | FLT3LG  | -1.929 | 0.015   | 0.180   | CSF2     | 2.129  | 0.031   | 0.200   |
| IL17B   | 4.231  | 1.85E-03 | 0.163   | GZMB    | -1.904 | 0.015   | 0.180   | OSM      | 2.094  | 0.031   | 0.200   |
| CD3EAP  | 3.167  | 1.86E-03 | 0.163   | SPO11   | 3.524  | 0.015   | 0.180   | PDCD1LG2 | 1.771  | 0.031   | 0.200   |
| C6      | 3.966  | 2.03E-03 | 0.163   | KIR3DL2 | 2.927  | 0.015   | 0.180   | TFE3     | 1.796  | 0.031   | 0.200   |
| TNFSF11 | 3.536  | 2.08E-03 | 0.163   | CCL24   | 3.096  | 0.015   | 0.180   | TNFSF4   | 1.751  | 0.032   | 0.203   |
| CD209   | 2.912  | 2.41E-03 | 0.163   | CCL17   | 2.550  | 0.016   | 0.180   | CXCL13   | 1.983  | 0.033   | 0.205   |
| TLR9    | 3.639  | 2.63E-03 | 0.163   | IFNA2   | 2.804  | 0.016   | 0.180   | RORC     | 2.106  | 0.033   | 0.205   |
| TNFSF18 | 3.015  | 2.76E-03 | 0.163   | MERTK   | 1.198  | 0.016   | 0.180   | CD1A     | 2.194  | 0.033   | 0.206   |
| MAPK11  | 3.880  | 2.81E-03 | 0.163   | IL4     | 2.547  | 0.017   | 0.180   | EGR1     | 1.749  | 0.034   | 0.206   |
| IL5RA   | 3.671  | 2.91E-03 | 0.163   | IRF2    | 1.571  | 0.017   | 0.180   | IL2      | 2.483  | 0.034   | 0.206   |
| CXCR1   | 3.309  | 3.24E-03 | 0.163   | SMPD3   | 2.500  | 0.017   | 0.180   | RAG1     | 2.139  | 0.034   | 0.206   |
| IL22RA1 | 3.394  | 3.25E-03 | 0.163   | CLEC6A  | 2.728  | 0.017   | 0.180   | IL1RAPL2 | 2.149  | 0.035   | 0.207   |
| CSF3    | 3.794  | 3.42E-03 | 0.163   | ARG1    | 2.402  | 0.017   | 0.180   | CASP10   | 1.670  | 0.035   | 0.209   |
| C8G     | 3.223  | 3.66E-03 | 0.163   | IL32    | -1.333 | 0.017   | 0.180   | C8B      | 2.079  | 0.036   | 0.209   |
| IL17A   | 3.421  | 3.81E-03 | 0.163   | AICDA   | 2.171  | 0.018   | 0.181   | SELL     | -1.299 | 0.036   | 0.209   |
| IFNL1   | 3.243  | 4.01E-03 | 0.163   | SEMG1   | 2.878  | 0.018   | 0.181   | IL24     | 2.202  | 0.037   | 0.210   |
| DMBT1   | 3.295  | 4.24E-03 | 0.163   | MPPED1  | 2.728  | 0.018   | 0.184   | TTK      | 1.999  | 0.037   | 0.210   |
| MCAM    | 3.069  | 4.54E-03 | 0.166   | LTK     | 2.518  | 0.019   | 0.184   | RPS6     | -1.360 | 0.037   | 0.210   |
| THBS1   | 2.723  | 4.91E-03 | 0.168   | NFATC4  | 2.367  | 0.019   | 0.184   | C8A      | 2.037  | 0.038   | 0.211   |
| IL1B    | -2.961 | 5.11E-03 | 0.168   | CREBBP  | 2.498  | 0.020   | 0.184   | CD1B     | 1.932  | 0.038   | 0.211   |
| TLR10   | 2.813  | 5.30E-03 | 0.168   | IL22    | 2.961  | 0.020   | 0.184   | FPR2     | 1.325  | 0.039   | 0.211   |
| IL26    | 2.906  | 6.50E-03 | 0.178   | CCL21   | 2.358  | 0.020   | 0.184   | SERPINB2 | 1.662  | 0.039   | 0.211   |
| ETS1    | -1.608 | 6.85E-03 | 0.178   | CCL1    | 2.237  | 0.021   | 0.184   | TNFRSF17 | 2.082  | 0.039   | 0.211   |
| CD3E    | -1.910 | 7.17E-03 | 0.178   | BAGE    | 2.558  | 0.021   | 0.184   | CCL8     | 1.647  | 0.039   | 0.211   |
| IL1RL2  | 3.021  | 7.74E-03 | 0.178   | MASPI   | 2.451  | 0.021   | 0.184   | CCR6     | 1.892  | 0.039   | 0.211   |
| NCAM1   | 2.673  | 7.78E-03 | 0.178   | PTGDR2  | 2.681  | 0.021   | 0.184   | CD19     | 1.627  | 0.040   | 0.211   |
| KIR3DL3 | 2.944  | 7.79E-03 | 0.178   | MAGEA3  | 2.400  | 0.021   | 0.184   | IFIT2    | 1.316  | 0.040   | 0.211   |

|         |        |          |       |           |        |       |       |         |        |       |       |
|---------|--------|----------|-------|-----------|--------|-------|-------|---------|--------|-------|-------|
| CCL16   | 3.191  | 7.96E-03 | 0.178 | CD34      | 2.557  | 0.022 | 0.184 | CXCR5   | 2.216  | 0.040 | 0.211 |
| TPTE    | 3.224  | 8.33E-03 | 0.178 | ROPN1     | 2.647  | 0.022 | 0.184 | DEFB1   | 1.953  | 0.040 | 0.211 |
| CR2     | 2.864  | 8.46E-03 | 0.178 | C4BPA     | 2.936  | 0.022 | 0.184 | FOXP3   | 1.765  | 0.040 | 0.211 |
| IL8     | -3.148 | 8.63E-03 | 0.178 | TIRAP     | 2.104  | 0.022 | 0.184 | IL3     | 2.495  | 0.042 | 0.214 |
| IGLL1   | 3.073  | 8.85E-03 | 0.178 | IL23R     | 2.313  | 0.022 | 0.184 | JAM3    | 2.079  | 0.042 | 0.214 |
| IL13    | 2.755  | 9.58E-03 | 0.178 | BIRC5     | 1.951  | 0.023 | 0.188 | CD274   | 2.155  | 0.042 | 0.214 |
| BLK     | 2.833  | 9.60E-03 | 0.178 | NFATC1    | 1.752  | 0.023 | 0.188 | CCL11   | 1.977  | 0.042 | 0.214 |
| MAGEA12 | 3.314  | 9.70E-03 | 0.178 | NT5E      | 2.263  | 0.024 | 0.189 | IL11    | 1.890  | 0.043 | 0.214 |
| CRP     | 2.906  | 0.010    | 0.178 | IL21      | 2.430  | 0.025 | 0.194 | PBK     | 1.987  | 0.044 | 0.218 |
| IL25    | 2.726  | 0.010    | 0.178 | AMBP      | 2.372  | 0.025 | 0.194 | IRGM    | 1.745  | 0.044 | 0.218 |
| CCL22   | 2.368  | 0.010    | 0.178 | IL27      | 2.085  | 0.025 | 0.194 | EOMES   | 2.094  | 0.044 | 0.218 |
| ZNF205  | 2.686  | 0.010    | 0.178 | ELK1      | 1.890  | 0.025 | 0.195 | TMEFF2  | 2.064  | 0.045 | 0.219 |
| CCL18   | 2.046  | 0.011    | 0.178 | SH2B2     | 1.891  | 0.026 | 0.196 | MRC1    | 0.998  | 0.045 | 0.220 |
| CMA1    | 2.677  | 0.011    | 0.178 | CCL25     | 2.302  | 0.026 | 0.196 | CDK1    | 1.723  | 0.046 | 0.220 |
| IL15    | 2.300  | 0.011    | 0.178 | IL5       | 2.511  | 0.027 | 0.196 | ARG2    | 2.140  | 0.046 | 0.220 |
| XCR1    | 2.253  | 0.011    | 0.178 | IFIT1     | 1.460  | 0.027 | 0.196 | C9      | 2.201  | 0.046 | 0.220 |
| CD247   | -1.721 | 0.011    | 0.178 | FADD      | 2.362  | 0.028 | 0.196 | PRF1    | -1.288 | 0.047 | 0.220 |
| AIRE    | 2.801  | 0.012    | 0.180 | CCL28     | 2.339  | 0.029 | 0.196 | MAGEC2  | 1.933  | 0.047 | 0.220 |
| CTAG1B  | 2.648  | 0.012    | 0.180 | NOS2A     | 2.220  | 0.029 | 0.196 | CD79B   | 1.828  | 0.047 | 0.220 |
| PASD1   | 2.504  | 0.012    | 0.180 | IL1A      | 2.298  | 0.029 | 0.196 | CCL15   | 2.226  | 0.047 | 0.220 |
| GZMA    | -1.579 | 0.013    | 0.180 | TNFRSF13C | -2.016 | 0.029 | 0.196 | CEACAM8 | 2.236  | 0.048 | 0.223 |
| CCL19   | 2.497  | 0.013    | 0.180 | MBL2      | 2.136  | 0.029 | 0.196 | IL2RG   | -0.967 | 0.049 | 0.223 |
| MAGEA1  | 3.280  | 0.013    | 0.180 | TNFRSF13B | 2.367  | 0.029 | 0.196 | SYCP1   | 2.216  | 0.050 | 0.226 |
| CCR9    | 2.734  | 0.013    | 0.180 | CXCR4     | -1.482 | 0.029 | 0.196 | PPBP    | -2.229 | 0.050 | 0.226 |
| CTCFL   | 2.675  | 0.013    | 0.180 | LTF       | 2.362  | 0.029 | 0.196 |         |        |       |       |

**Supplemental Table S2** IP fluid DE genes between early and intermediate time points (p<0.05)

| Gene      | log2FC | p-value  | q-value | Gene     | log2FC | p-value | q-value |
|-----------|--------|----------|---------|----------|--------|---------|---------|
| FCER1A    | -3.379 | 5.94E-04 | 0.265   | CXCR4    | 1.922  | 0.022   | 0.654   |
| CXCL5     | 3.188  | 7.26E-04 | 0.265   | CD160    | -2.306 | 0.026   | 0.654   |
| THBS1     | 2.555  | 1.18E-03 | 0.286   | CCR2     | -1.814 | 0.027   | 0.654   |
| CD1C      | -2.514 | 2.47E-03 | 0.438   | POU2AF1  | 1.998  | 0.027   | 0.654   |
| BLK       | 2.330  | 3.79E-03 | 0.438   | IL4R     | 1.374  | 0.027   | 0.654   |
| CXCL10    | -3.704 | 4.38E-03 | 0.438   | CD79B    | 1.743  | 0.027   | 0.654   |
| CX3CR1    | -2.535 | 4.76E-03 | 0.438   | HLA-DPA1 | -1.374 | 0.031   | 0.699   |
| TNFRSF13C | 2.747  | 4.80E-03 | 0.438   | CXCL9    | -2.451 | 0.032   | 0.699   |
| CXCL12    | -2.534 | 9.16E-03 | 0.547   | TNFSF14  | -1.957 | 0.034   | 0.699   |
| CCL17     | 2.395  | 9.60E-03 | 0.547   | CXCL11   | -2.316 | 0.035   | 0.699   |
| IL7R      | 2.333  | 9.83E-03 | 0.547   | ITK      | 1.801  | 0.036   | 0.699   |
| MS4A1     | 2.546  | 0.010    | 0.547   | LY9      | 1.717  | 0.036   | 0.699   |
| CD79A     | 2.625  | 0.011    | 0.547   | TXK      | 1.510  | 0.039   | 0.699   |
| C4B       | -2.894 | 0.011    | 0.547   | SERPINB2 | 1.664  | 0.041   | 0.699   |
| CTLA4     | 2.037  | 0.011    | 0.547   | MAGEB2   | -1.771 | 0.041   | 0.699   |
| FCER2     | 1.944  | 0.013    | 0.587   | SIGLEC1  | -1.543 | 0.041   | 0.699   |
| C3        | -2.587 | 0.015    | 0.617   | CYBB     | -1.305 | 0.042   | 0.699   |
| ICOS      | 2.092  | 0.015    | 0.617   | PPBP     | -2.662 | 0.042   | 0.699   |
| ISG20     | 1.692  | 0.017    | 0.640   | LILRB3   | -1.537 | 0.043   | 0.699   |
| LILRA1    | -1.908 | 0.018    | 0.640   | HLA-DPB1 | -1.229 | 0.043   | 0.699   |
| CD19      | 1.653  | 0.019    | 0.640   | TNFSF13  | -1.330 | 0.045   | 0.699   |
| CD22      | 1.636  | 0.020    | 0.640   | TNFSF8   | 1.312  | 0.045   | 0.699   |
| PAX5      | 1.944  | 0.020    | 0.640   | AICDA    | 1.449  | 0.048   | 0.699   |
| ETS1      | 1.778  | 0.022    | 0.654   | TLR7     | -1.375 | 0.049   | 0.699   |

**Supplemental Table S3** IP fluid DE genes between intermediate and late time points (p<0.05)

| Gene      | log2FC | p-value  | q-value | Gene    | log2FC | p-value | q-value | Gene   | log2FC | p-value | q-value |
|-----------|--------|----------|---------|---------|--------|---------|---------|--------|--------|---------|---------|
| CXCR4     | -3.166 | 2.05E-04 | 0.084   | ZAP70   | -1.995 | 0.018   | 0.284   | IL1RL2 | 3.253  | 0.036   | 0.284   |
| ETS1      | -3.219 | 2.75E-04 | 0.084   | IGLL1   | 3.795  | 0.019   | 0.284   | CD1E   | 2.809  | 0.037   | 0.284   |
| TNFRSF13C | -4.707 | 3.99E-04 | 0.084   | CD1B    | 3.534  | 0.019   | 0.284   | CMA1   | 3.094  | 0.037   | 0.284   |
| CD3E      | -3.222 | 4.58E-04 | 0.084   | OAS3    | 1.909  | 0.019   | 0.284   | CD70   | 3.079  | 0.038   | 0.284   |
| IL7R      | -3.184 | 6.49E-04 | 0.095   | CXCR1   | 3.705  | 0.020   | 0.284   | SEMG1  | 3.728  | 0.038   | 0.284   |
| SELL      | -2.902 | 1.29E-03 | 0.151   | RORA    | -2.322 | 0.020   | 0.284   | IL5    | 3.202  | 0.038   | 0.284   |
| CD79A     | -3.538 | 1.58E-03 | 0.151   | CD1A    | 3.360  | 0.020   | 0.284   | TLR7   | 2.383  | 0.039   | 0.284   |
| CD247     | -2.682 | 1.77E-03 | 0.151   | LTB     | -1.973 | 0.020   | 0.284   | IFNL1  | 2.976  | 0.039   | 0.284   |
| FLT3LG    | -3.301 | 1.90E-03 | 0.151   | TNFSF18 | 3.055  | 0.020   | 0.284   | DMBT1  | 3.130  | 0.039   | 0.284   |
| TCF7      | -3.059 | 2.07E-03 | 0.151   | F13A1   | 1.802  | 0.020   | 0.284   | CD80   | 2.520  | 0.039   | 0.284   |
| CCR7      | -3.309 | 2.61E-03 | 0.173   | CD7     | -2.481 | 0.021   | 0.284   | CD3EAP | 2.744  | 0.040   | 0.284   |
| MS4A1     | -3.296 | 2.91E-03 | 0.176   | TLR4    | 1.534  | 0.022   | 0.284   | TPTE   | 3.079  | 0.040   | 0.284   |
| ITK       | -2.853 | 3.14E-03 | 0.176   | DEFB1   | 3.200  | 0.022   | 0.284   | MAPK11 | 3.546  | 0.040   | 0.284   |
| RPS6      | -2.201 | 3.74E-03 | 0.195   | MAGEA1  | 4.755  | 0.023   | 0.284   | FPR2   | 1.998  | 0.040   | 0.284   |
| CD1C      | 2.579  | 4.25E-03 | 0.200   | TNFAIP3 | -1.683 | 0.023   | 0.284   | CYBB   | 1.515  | 0.041   | 0.284   |
| ICOS      | -3.455 | 4.39E-03 | 0.200   | CSF2RB  | 2.012  | 0.024   | 0.284   | C4BPA  | 3.901  | 0.041   | 0.284   |
| CD3D      | -2.500 | 5.23E-03 | 0.218   | IL4     | 3.739  | 0.024   | 0.284   | IL1R1  | 1.695  | 0.041   | 0.284   |
| LY9       | -2.779 | 5.44E-03 | 0.218   | CYLD    | -1.573 | 0.024   | 0.284   | DUSP4  | -1.923 | 0.041   | 0.284   |
| CD48      | -1.886 | 5.66E-03 | 0.218   | TNFSF11 | 3.404  | 0.025   | 0.284   | LTA    | -2.153 | 0.041   | 0.284   |
| SELE      | 5.366  | 6.87E-03 | 0.248   | PASD1   | 3.188  | 0.025   | 0.284   | TLR9   | 3.183  | 0.041   | 0.284   |
| CD5       | -2.698 | 7.19E-03 | 0.248   | XCR1    | 2.832  | 0.025   | 0.284   | RAG1   | 3.150  | 0.041   | 0.284   |
| IL2RG     | -1.712 | 7.47E-03 | 0.248   | CD1D    | 2.163  | 0.026   | 0.284   | IL4R   | -1.309 | 0.042   | 0.284   |
| IFIT1     | 2.549  | 9.76E-03 | 0.274   | IL23R   | 3.330  | 0.026   | 0.284   | IL17B  | 3.493  | 0.042   | 0.284   |
| ITGA6     | -2.456 | 9.77E-03 | 0.274   | IL16    | -1.455 | 0.026   | 0.284   | IL9    | 3.208  | 0.042   | 0.284   |
| CTLA4     | -2.385 | 9.83E-03 | 0.274   | NCAM1   | 2.923  | 0.027   | 0.284   | SMAD3  | -1.719 | 0.043   | 0.284   |
| FYN       | -1.602 | 0.010    | 0.274   | CCL16   | 3.713  | 0.027   | 0.284   | MAGEB2 | 2.559  | 0.043   | 0.284   |
| JAK3      | -2.339 | 0.011    | 0.274   | CYFIP2  | -1.700 | 0.027   | 0.284   | IGF1R  | -1.823 | 0.043   | 0.284   |
| CD96      | -1.989 | 0.011    | 0.274   | CTCFL   | 3.751  | 0.028   | 0.284   | IL17RB | 3.541  | 0.044   | 0.284   |

|         |        |       |       |        |        |       |       |          |        |       |       |
|---------|--------|-------|-------|--------|--------|-------|-------|----------|--------|-------|-------|
| FCER1A  | 3.014  | 0.011 | 0.274 | LILRA1 | 2.546  | 0.029 | 0.284 | MAGEA12  | 3.598  | 0.044 | 0.284 |
| ANP32B  | -1.533 | 0.013 | 0.284 | CXCL6  | 2.065  | 0.029 | 0.284 | ARG2     | 2.701  | 0.045 | 0.285 |
| RUNX3   | -1.957 | 0.014 | 0.284 | HCK    | 1.465  | 0.031 | 0.284 | LTF      | 3.108  | 0.046 | 0.285 |
| IL22RA1 | 3.820  | 0.015 | 0.284 | LCK    | -1.824 | 0.031 | 0.284 | IL15     | 2.524  | 0.046 | 0.285 |
| THY1    | 2.029  | 0.015 | 0.284 | IL5RA  | 3.511  | 0.032 | 0.284 | STAT5B   | -1.648 | 0.046 | 0.285 |
| C3      | 2.211  | 0.015 | 0.284 | IL17A  | 3.492  | 0.032 | 0.284 | ROPN1    | 2.991  | 0.046 | 0.285 |
| CD209   | 3.337  | 0.016 | 0.284 | CD3G   | -2.030 | 0.032 | 0.284 | IL26     | 2.859  | 0.046 | 0.285 |
| TNFSF14 | 3.186  | 0.016 | 0.284 | CCND3  | -1.587 | 0.033 | 0.284 | PDCD1LG2 | 2.362  | 0.047 | 0.285 |
| SIGLEC1 | 1.864  | 0.016 | 0.284 | CXCL11 | 2.859  | 0.034 | 0.284 | IFNG     | 2.664  | 0.048 | 0.285 |
| CMKLR1  | 1.658  | 0.016 | 0.284 | CASP8  | -1.348 | 0.034 | 0.284 | CSF2     | 2.891  | 0.048 | 0.285 |
| CXCL10  | 3.080  | 0.016 | 0.284 | MCAM   | 3.033  | 0.034 | 0.284 | CLEC6A   | 3.275  | 0.048 | 0.285 |
| CX3CR1  | 2.145  | 0.016 | 0.284 | MEFV   | 3.012  | 0.034 | 0.284 | CCL19    | 2.835  | 0.049 | 0.286 |
| TXNIP   | -1.532 | 0.017 | 0.284 | IL6    | 2.821  | 0.036 | 0.284 | KIR3DL3  | 2.853  | 0.049 | 0.286 |
| SOCS1   | -2.137 | 0.017 | 0.284 | IL32   | -1.384 | 0.036 | 0.284 | C9       | 2.995  | 0.050 | 0.288 |

**Supplemental Table S4** List of DE genes in IP fluid that are shared between time comparisons.

Bolded genes have concurrent expression between time point comparisons

| Three time comparisons     | Early-Intermediate and<br>Early-Late                                                                                        | Intermediate-Late and Early-Late                                                                                                                                                                                                                                                                                                                                                                                                                                |                                                                                                                                                                                                                                                                                                                                                                                                                                                  | Early-Intermediate and<br>Intermediate-Late                                                                                                                                   |
|----------------------------|-----------------------------------------------------------------------------------------------------------------------------|-----------------------------------------------------------------------------------------------------------------------------------------------------------------------------------------------------------------------------------------------------------------------------------------------------------------------------------------------------------------------------------------------------------------------------------------------------------------|--------------------------------------------------------------------------------------------------------------------------------------------------------------------------------------------------------------------------------------------------------------------------------------------------------------------------------------------------------------------------------------------------------------------------------------------------|-------------------------------------------------------------------------------------------------------------------------------------------------------------------------------|
| ETS1<br>TNFRSF13C<br>CXCR4 | <b>THBS1</b><br><b>BLK</b><br><b>CCL17</b><br><b>AICDA</b><br><b>SERPINB2</b><br><b>CD19</b><br><b>CD79B</b><br><b>PPBP</b> | <b>SELE</b><br><b>CD70</b><br><b>IL17B</b><br><b>CD3EAP</b><br><b>TNFSF11</b><br><b>CD209</b><br><b>TLR9</b><br><b>TNFSF18</b><br><b>MAPK11</b><br><b>IL5RA</b><br><b>CXCR1</b><br><b>IL22RA1</b><br><b>IL17A</b><br><b>IFNL1</b><br><b>DMBT1</b><br><b>MCAM</b><br><b>IL26</b><br><b>CD3E</b><br><b>IL1RL2</b><br><b>NCAM1</b><br><b>KIR3DL3</b><br><b>CCL16</b><br><b>TPTE</b><br><b>IGLL1</b><br><b>MAGEA12</b><br><b>CMA1</b><br><b>IL15</b><br><b>XCR1</b> | <b>CD247</b><br><b>PASD1</b><br><b>CCL19</b><br><b>MAGEA1</b><br><b>CTCFL</b><br><b>FLT3LG</b><br><b>IL4</b><br><b>CLEC6A</b><br><b>IL32</b><br><b>SEMG1</b><br><b>ROPN1</b><br><b>C4BPA</b><br><b>IL23R</b><br><b>IL5</b><br><b>IFIT1</b><br><b>LTF</b><br><b>CSF2</b><br><b>PDCD1LG2</b><br><b>CD1A</b><br><b>RAG1</b><br><b>SELL</b><br><b>RPS6</b><br><b>CD1B</b><br><b>FPR2</b><br><b>DEFB1</b><br><b>ARG2</b><br><b>C9</b><br><b>IL2RG</b> | FCER1A<br>CD1C<br>CXCL10<br>CX3CR1<br>IL7R<br>MS4A1<br>CD79A<br>CTLA4<br>C3<br>ICOS<br>LILRA1<br>IL4R<br>TNFSF14<br>CXCL11<br>ITK<br>LY9<br>MAGEB2<br>SIGLEC1<br>CYBB<br>TLR7 |

**Supplemental Table S5** Combined IPA of DE genes in IP fluid identified the top canonical pathways in which these genes are involved for all three comparisons

| Early-Late Comparison                                                          |           | Early-Intermediate Comparison                               |          | Intermediate-Late Comparison                                                 |          |
|--------------------------------------------------------------------------------|-----------|-------------------------------------------------------------|----------|------------------------------------------------------------------------------|----------|
| Pathway                                                                        | p-value   | Pathway                                                     | p-value  | Pathway                                                                      | p-value  |
| Role of cytokines in mediating communication between immune cells              | 5.96E-29  | Systemic lupus erythematosus in B cell signaling pathway    | 1.02E-11 | Th1 and Th2 activation pathway                                               | 1.60E-22 |
| Role of pattern recognition receptors in recognition of bacteria and viruses   | 1.63E-21  | Primary immunodeficiency signaling                          | 9.55E-10 | Role of pattern recognition receptors in recognition of bacteria and viruses | 1.71E-20 |
| HMGB1 Signaling                                                                | 1.95E-19  | Granulocyte adhesion and diapedesis                         | 3.94E-09 | Crosstalk between dendritic cells and natural killer cells                   | 3.79E-20 |
| Altered T cell and B cell signaling in rheumatoid arthritis                    | 3.17E-19  | Agranulocyte adhesion and diapedesis                        | 6.64E-09 | Cardiac hypertrophy signaling (enhanced)                                     | 1.42E-19 |
| Granulocyte adhesion and diapedesis                                            | 9.55E-19  | Communication between innate and adaptive immune cells      | 5.18E-08 | Systemic lupus erythematosus in B cell signaling pathway                     | 1.93E-19 |
| Cardiac hypertrophy signal                                                     | 1.00E-18  | PI3K Signaling in B Lymphocytes                             | 4.47E-07 | Th2 Pathway                                                                  | 1.58E-18 |
| Hepatic Cholestasis                                                            | 1.58E-18  | Pathogenesis of Multiple Sclerosis                          | 7.41E-07 | Altered T Cell and B Cell Signaling in Rheumatoid Arthritis                  | 2.00E-18 |
| Systemic lupus erythematosus in B cell signaling pathway                       | 5.01E-18  | B Cell Development                                          | 9.77E-07 | HMGB1 Signaling                                                              | 3.98E-17 |
| Role of macrophages, fibroblasts and endothelial cells in rheumatoid arthritis | 6.31E-17  | Altered T Cell and B Cell Signaling in Rheumatoid Arthritis | 1.32E-06 | Primary Immunodeficiency Signaling                                           | 5.01E-17 |
| Agranulocyte adhesion and diapedesis                                           | 7.944E-17 | B Cell Receptor Signaling                                   | 2.51E-06 | Communication between Innate and Adaptive Immune Cells                       | 2.00E-16 |

# Supplemental Table S6 DE genes between pre-treatment and post-treatment tumor tissue

(p<0.05)

| Gene                      | log2FC | p-value | q-value | Gene                      | log2FC | p-value | q-value |
|---------------------------|--------|---------|---------|---------------------------|--------|---------|---------|
| CXCL9                     | -2.451 | 0.002   | 0.497   | IL19                      | 1.481  | 0.026   | 0.497   |
| CT45A1                    | -3.161 | 0.004   | 0.497   | MASP1                     | 1.734  | 0.026   | 0.497   |
| ISG15                     | -2.541 | 0.005   | 0.497   | IFNL1                     | 1.435  | 0.026   | 0.497   |
| STAT1                     | -1.915 | 0.005   | 0.497   | IL4                       | 1.896  | 0.026   | 0.497   |
| SPP1                      | -2.987 | 0.005   | 0.497   | IFNL2                     | 1.797  | 0.029   | 0.497   |
| CXCL10                    | -2.349 | 0.005   | 0.497   | IL17A                     | 1.815  | 0.031   | 0.497   |
| IL5                       | 2.048  | 0.007   | 0.497   | KIR3DL3                   | 1.701  | 0.032   | 0.497   |
| CDK1                      | -1.632 | 0.007   | 0.497   | IKBKE                     | -1.044 | 0.032   | 0.497   |
| BST2                      | -1.901 | 0.007   | 0.497   | LTA                       | 1.460  | 0.034   | 0.497   |
| PBK                       | -2.312 | 0.008   | 0.497   | C4BPA                     | 1.476  | 0.035   | 0.497   |
| CCL21                     | -2.939 | 0.011   | 0.497   | CMA1                      | 1.450  | 0.036   | 0.497   |
| MX1                       | -1.945 | 0.012   | 0.497   | S100A7                    | 1.523  | 0.036   | 0.497   |
| CD24                      | -2.625 | 0.012   | 0.497   | IL1RL1                    | 1.440  | 0.036   | 0.497   |
| CXCR4                     | -1.930 | 0.013   | 0.497   | SPACA3                    | 1.538  | 0.036   | 0.497   |
| KIR_Inhibiting_Subgroup_2 | 1.886  | 0.013   | 0.497   | AMBP                      | 1.603  | 0.036   | 0.497   |
| IL23A                     | 1.972  | 0.014   | 0.497   | KLRC1                     | 1.361  | 0.037   | 0.497   |
| CD22                      | -1.841 | 0.015   | 0.497   | PPBP                      | 1.550  | 0.038   | 0.497   |
| PASD1                     | 1.914  | 0.016   | 0.497   | NFATC1                    | 0.993  | 0.039   | 0.497   |
| KIR_Inhibiting_Subgroup_1 | 1.799  | 0.017   | 0.497   | KIR_Activating_Subgroup_2 | 1.511  | 0.040   | 0.497   |
| IFIT1                     | -1.770 | 0.017   | 0.497   | C8A                       | 1.365  | 0.040   | 0.497   |
| IL25                      | 1.754  | 0.017   | 0.497   | CXCR1                     | 3.309  | 0.041   | 0.497   |
| DDX58                     | -1.382 | 0.018   | 0.497   | IL12B                     | 1.484  | 0.041   | 0.497   |
| CTAGE1                    | 1.882  | 0.019   | 0.497   | IFI27                     | -1.455 | 0.041   | 0.497   |
| OAS3                      | -1.316 | 0.020   | 0.497   | CD244                     | 1.250  | 0.042   | 0.497   |
| CCL1                      | 1.797  | 0.020   | 0.497   | FEZ1                      | 0.907  | 0.042   | 0.497   |
| GAGE1                     | 1.736  | 0.020   | 0.497   | DMBT1                     | 1.442  | 0.043   | 0.497   |
| CXCR2                     | 1.799  | 0.022   | 0.497   | LTB                       | -1.294 | 0.043   | 0.497   |
| S100A8                    | 1.876  | 0.023   | 0.497   | MAGEC2                    | 1.630  | 0.043   | 0.497   |



|        |        |       |       |       |        |       |       |
|--------|--------|-------|-------|-------|--------|-------|-------|
| IL26   | 1.634  | 0.023 | 0.497 | LCN2  | -1.877 | 0.045 | 0.497 |
| CCL7   | 1.705  | 0.024 | 0.497 | CCL23 | 1.175  | 0.045 | 0.497 |
| MAGEB2 | 1.698  | 0.024 | 0.497 | CCL15 | 1.459  | 0.045 | 0.497 |
| SH2D1B | 1.623  | 0.025 | 0.497 | LRRN3 | 1.144  | 0.045 | 0.497 |
| MBL2   | 1.874  | 0.025 | 0.497 | IFNA7 | 1.465  | 0.048 | 0.503 |
| IDO1   | -1.780 | 0.025 | 0.497 | IRF7  | -0.896 | 0.050 | 0.503 |

**Supplemental Table S7** DE genes shared between early and late comparison in IP fluid and tumor tissue. Genes with concordant expression are bolded

| Gene           |               |
|----------------|---------------|
| <b>CXCR1</b>   | <b>C4BPA</b>  |
| <b>IL17A</b>   | <b>NFATC1</b> |
| <b>IFNL1</b>   | <b>AMBP</b>   |
| <b>DMBT1</b>   | <b>IL5</b>    |
| <b>IL26</b>    | IFIT1         |
| <b>KIR3DL3</b> | <b>MBL2</b>   |
| <b>IL25</b>    | <b>CXCR4</b>  |
| <b>CMA1</b>    | <b>C8A</b>    |
| <b>PASD1</b>   | PBK           |
| <b>IL4</b>     | CDK1          |
| CCL21          | <b>MAGEC2</b> |
| <b>CCL1</b>    | <b>CCL15</b>  |
| <b>MASP1</b>   | PPBP          |

**Supplemental Table S8** PBMC DE genes between early and late time points (p<0.05)

| Gene     | log2FC | p-value  | q-value | Gene    | log2FC | p-value  | q-value |
|----------|--------|----------|---------|---------|--------|----------|---------|
| CXCL3    | 5.544  | 6.77E-04 | 0.150   | APOE    | 2.330  | 9.42E-03 | 0.255   |
| IL8      | 5.750  | 7.26E-04 | 0.150   | THBS1   | 2.271  | 0.010    | 0.273   |
| SPP1     | 5.931  | 7.50E-04 | 0.150   | LAMP3   | 2.685  | 0.012    | 0.297   |
| CXCL1    | 5.118  | 1.09E-03 | 0.150   | IL24    | 2.198  | 0.013    | 0.311   |
| CCL20    | 4.555  | 1.43E-03 | 0.150   | USP9Y   | 0.880  | 0.016    | 0.357   |
| IL1B     | 4.617  | 1.56E-03 | 0.150   | NRP1    | 2.593  | 0.016    | 0.357   |
| CXCL13   | 4.913  | 1.59E-03 | 0.150   | CCL19   | 2.113  | 0.021    | 0.474   |
| CCL22    | 4.408  | 1.91E-03 | 0.150   | TNFSF10 | -1.044 | 0.026    | 0.561   |
| CCL2     | 5.672  | 1.93E-03 | 0.150   | ENG     | 1.723  | 0.027    | 0.568   |
| CXCL2    | 3.547  | 2.43E-03 | 0.150   | IL1R1   | 1.562  | 0.029    | 0.568   |
| CXCL5    | 3.875  | 2.47E-03 | 0.150   | OSM     | 1.851  | 0.029    | 0.568   |
| CCL24    | 4.245  | 2.63E-03 | 0.150   | MME     | 1.626  | 0.030    | 0.568   |
| IL1A     | 3.823  | 3.06E-03 | 0.150   | IL19    | 1.841  | 0.030    | 0.568   |
| IL1R2    | 2.789  | 3.09E-03 | 0.150   | IFIT1   | -1.464 | 0.032    | 0.586   |
| SERPINB2 | 3.616  | 3.19E-03 | 0.150   | CCL23   | 1.489  | 0.035    | 0.627   |
| PLAU     | 3.530  | 3.47E-03 | 0.150   | IL10    | 1.827  | 0.036    | 0.627   |
| DUSP4    | 3.601  | 3.49E-03 | 0.150   | C3      | 1.899  | 0.038    | 0.639   |
| FN1      | 3.382  | 4.00E-03 | 0.158   | CD83    | 1.387  | 0.039    | 0.639   |
| IL6      | 2.836  | 4.11E-03 | 0.158   | CXCR4   | 1.152  | 0.039    | 0.639   |
| PPARG    | 1.774  | 5.15E-03 | 0.188   | CXCL16  | 1.290  | 0.041    | 0.649   |
| VEGFA    | 2.514  | 5.47E-03 | 0.190   | NT5E    | 1.673  | 0.043    | 0.662   |
| CTSL     | 3.202  | 5.82E-03 | 0.193   | TNFAIP3 | 1.211  | 0.044    | 0.662   |
| CLEC5A   | 3.457  | 6.81E-03 | 0.208   | CCL3L1  | 1.537  | 0.044    | 0.662   |
| PLAUR    | 1.931  | 7.18E-03 | 0.208   | CCL3    | 1.572  | 0.046    | 0.666   |
| CCL7     | 3.039  | 7.27E-03 | 0.208   | IRAK2   | 1.460  | 0.047    | 0.680   |
| IDO1     | 3.011  | 7.42E-03 | 0.208   |         |        |          |         |

**Supplemental Table S9** DE genes that are shared between early and late comparisons of IP fluid, tumor tissue and PBMCs. Genes with concordant expression are bolded

| Three sample type comparison | IP fluid and PBMCs | Tumor tissue and PBMCs |
|------------------------------|--------------------|------------------------|
| CXCR4                        | <b>IL1R2</b>       | SPP1                   |
| IFIT1                        | <b>THBS1</b>       | CXCR4                  |
|                              | IL1B               | <b>IFIT1</b>           |
|                              | IL8                | <b>CCL7</b>            |
|                              | <b>CCL22</b>       | IDO1                   |
|                              | <b>CCL19</b>       | <b>IL19</b>            |
|                              | <b>CCL24</b>       | <b>CCL23</b>           |
|                              | <b>NT5E</b>        |                        |
|                              | IFIT1              |                        |
|                              | <b>IL1A</b>        |                        |
|                              | CXCR4              |                        |
|                              | <b>OSM</b>         |                        |
|                              | <b>CXCL13</b>      |                        |
|                              | <b>IL24</b>        |                        |
|                              | <b>SERPINB2</b>    |                        |

**Supplemental Table S10** Combined IPA of DE genes for early and late time points of tumor tissue and PBMCs identified the top canonical pathways in which these genes are involved

| Tumor tissue                                                                 |          | PBMC                                                                                                  |          |
|------------------------------------------------------------------------------|----------|-------------------------------------------------------------------------------------------------------|----------|
| Pathway                                                                      | p-value  | Pathway                                                                                               | p-value  |
| Role of cytokines in mediating communication between immune cells            | 3.00E-14 | Granulocyte adhesion and diapedesis                                                                   | 2.13E-31 |
| Role of pattern recognition receptors in recognition of bacteria and viruses | 5.31E-13 | Agranulocyte adhesion and diapedesis                                                                  | 9.87E-31 |
| Systemic lupus erythematosus in B cell signaling pathway                     | 6.87E-13 | TREM1 signaling                                                                                       | 7.75E-14 |
| Granulocyte adhesion and diapedesis                                          | 2.95E-12 | Hepatic fibrosis/hepatic stellate cell activation                                                     | 2.96E-13 |
| Agranulocyte adhesion and diapedesis                                         | 6.30E-12 | Role of IL17-A in arthritis                                                                           | 4.09E-13 |
| Th1 and Th2 Activation Pathway                                               | 5.01E-11 | Differential Regulation of Cytokine Production in Macrophages and T Helper Cells by IL-17A and IL-17F | 1.58E-12 |
| Altered T Cell and B Cell Signaling in Rheumatoid Arthritis                  | 1.62E-10 | Role of Macrophages, Fibroblasts and Endothelial Cells in Rheumatoid Arthritis                        | 3.98E-12 |
| Activation of IRF by Cytosolic Pattern Recognition Receptors                 | 4.9E-10  | Role of IL-17F in Allergic Inflammatory Airway Diseases                                               | 5.01E-12 |
| Hepatic Cholestasis                                                          | 2.45E-09 | LXR/RXR Activation                                                                                    | 6.31E-12 |
| Cardiac Hypertrophy Signaling (Enhanced)                                     | 9.77E-09 | Differential Regulation of Cytokine Production in Intestinal Epithelial Cells by IL-17A and IL-17F    | 1.00E-11 |

**Supplemental Table S11** IP fluid DE genes in secondary cohort after one cycle of platinum based chemotherapy (p<0.05)

| Gene                      | log2FC | p-value  | q-value | Gene                      | log2FC | p-value | q-value | Gene     | log2FC | p-value | q-value |
|---------------------------|--------|----------|---------|---------------------------|--------|---------|---------|----------|--------|---------|---------|
| TPSAB1                    | -4.450 | 1.78E-03 | 0.237   | ENTPD1                    | 2.190  | 0.018   | 0.237   | TNFRSF17 | 2.095  | 0.031   | 0.237   |
| CR2                       | 3.473  | 2.56E-03 | 0.237   | CSF2                      | 2.511  | 0.018   | 0.237   | IL5RA    | 2.022  | 0.031   | 0.237   |
| SH2B2                     | 2.746  | 2.59E-03 | 0.237   | KIR3DL3                   | 2.532  | 0.018   | 0.237   | BLK      | 2.322  | 0.031   | 0.237   |
| CCL13                     | 2.985  | 3.09E-03 | 0.237   | ICAM4                     | 2.201  | 0.018   | 0.237   | CD34     | 2.378  | 0.031   | 0.237   |
| CCL18                     | 2.513  | 3.20E-03 | 0.237   | MR1                       | 1.899  | 0.019   | 0.237   | HAMP     | 1.807  | 0.032   | 0.237   |
| IL34                      | 3.439  | 3.36E-03 | 0.237   | TMEFF2                    | 2.467  | 0.019   | 0.237   | PMCH     | 2.068  | 0.033   | 0.237   |
| IL5                       | 3.188  | 4.45E-03 | 0.237   | IFNL1                     | 2.735  | 0.019   | 0.237   | CCL8     | 1.843  | 0.033   | 0.237   |
| HSD11B1                   | 3.416  | 4.53E-03 | 0.237   | PLA2G6                    | 2.026  | 0.020   | 0.237   | ZNF205   | 2.186  | 0.034   | 0.237   |
| CLEC6A                    | 3.092  | 5.18E-03 | 0.237   | IL11RA                    | 2.263  | 0.020   | 0.237   | IL13     | 2.366  | 0.034   | 0.237   |
| TLR9                      | 2.970  | 5.26E-03 | 0.237   | PTGS2                     | 1.938  | 0.020   | 0.237   | CD40LG   | 1.649  | 0.034   | 0.237   |
| MCAM                      | 3.029  | 5.82E-03 | 0.237   | PAX5                      | 2.590  | 0.020   | 0.237   | IL22RA2  | 2.206  | 0.034   | 0.237   |
| MAPK11                    | 3.109  | 6.78E-03 | 0.237   | KIR_Inhibiting_Subgroup_1 | 2.146  | 0.020   | 0.237   | LAIR2    | 1.500  | 0.034   | 0.237   |
| ATM                       | 2.914  | 6.94E-03 | 0.237   | TNFRSF12A                 | 2.155  | 0.021   | 0.237   | NT5E     | 1.819  | 0.034   | 0.237   |
| CREBBP                    | 2.951  | 7.25E-03 | 0.237   | C6                        | 2.383  | 0.022   | 0.237   | IFIT2    | -1.558 | 0.035   | 0.237   |
| CD70                      | 2.616  | 7.58E-03 | 0.237   | LBP                       | 2.650  | 0.023   | 0.237   | MAGEA12  | 2.243  | 0.035   | 0.237   |
| CCL19                     | 2.662  | 7.69E-03 | 0.237   | CTCFL                     | 2.435  | 0.023   | 0.237   | CXCL9    | 1.705  | 0.036   | 0.237   |
| CCL28                     | 2.895  | 8.37E-03 | 0.237   | IL12A                     | 2.360  | 0.023   | 0.237   | MAGEC2   | 2.302  | 0.036   | 0.237   |
| MAGEC1                    | 3.101  | 8.64E-03 | 0.237   | TLR10                     | 2.152  | 0.023   | 0.237   | CLU      | 2.215  | 0.036   | 0.237   |
| IL9                       | 2.778  | 9.50E-03 | 0.237   | MAGEA4                    | 2.185  | 0.024   | 0.237   | NCAM1    | 1.709  | 0.036   | 0.237   |
| IL2                       | 2.871  | 9.56E-03 | 0.237   | ARG2                      | 2.130  | 0.024   | 0.237   | PASD1    | 2.338  | 0.037   | 0.237   |
| CD79B                     | 2.198  | 0.010    | 0.237   | CDH5                      | 2.107  | 0.024   | 0.237   | IL3      | 2.346  | 0.038   | 0.237   |
| IL15                      | 2.302  | 0.010    | 0.237   | IL24                      | 2.375  | 0.025   | 0.237   | SELE     | 2.409  | 0.038   | 0.237   |
| PPBP                      | 2.462  | 0.011    | 0.237   | OSM                       | 1.910  | 0.025   | 0.237   | NFATC4   | 2.087  | 0.038   | 0.237   |
| PDGFRB                    | 2.591  | 0.011    | 0.237   | BTLA                      | 1.752  | 0.025   | 0.237   | USP9Y    | 2.166  | 0.038   | 0.237   |
| TNFRSF9                   | 2.277  | 0.012    | 0.237   | IL10                      | 1.605  | 0.026   | 0.237   | ECSIT    | 1.544  | 0.039   | 0.237   |
| KIR_Inhibiting_Subgroup_2 | 2.271  | 0.012    | 0.237   | CD1B                      | 1.941  | 0.026   | 0.237   | CMA1     | 2.325  | 0.039   | 0.237   |
| MPPED1                    | 2.769  | 0.012    | 0.237   | NEFL                      | 2.314  | 0.026   | 0.237   | MME      | 1.896  | 0.039   | 0.237   |

|          |       |       |       |           |       |       |       |           |        |       |       |
|----------|-------|-------|-------|-----------|-------|-------|-------|-----------|--------|-------|-------|
| NCR1     | 2.051 | 0.012 | 0.237 | FLT3      | 1.899 | 0.026 | 0.237 | TNFRSF11B | 1.935  | 0.039 | 0.237 |
| IL1RAPL2 | 2.562 | 0.014 | 0.237 | IL1RL2    | 2.454 | 0.027 | 0.237 | IFNL2     | 2.101  | 0.040 | 0.237 |
| CSF3     | 2.497 | 0.014 | 0.237 | IFNG      | 1.731 | 0.027 | 0.237 | CCL1      | 2.250  | 0.040 | 0.237 |
| FAS      | 2.074 | 0.014 | 0.237 | EBI3      | 2.448 | 0.027 | 0.237 | CLEC4C    | 1.642  | 0.040 | 0.237 |
| TNFSF11  | 2.694 | 0.014 | 0.237 | NOS2A     | 2.454 | 0.027 | 0.237 | MAGEB2    | 1.726  | 0.041 | 0.238 |
| IL12B    | 2.579 | 0.014 | 0.237 | SPACA3    | 2.212 | 0.028 | 0.237 | TAL1      | 2.254  | 0.041 | 0.238 |
| JAM3     | 2.543 | 0.015 | 0.237 | XCR1      | 1.899 | 0.028 | 0.237 | SIGIRR    | 1.284  | 0.041 | 0.239 |
| IL22     | 2.925 | 0.015 | 0.237 | ITGA2B    | 2.294 | 0.028 | 0.237 | CXCR2     | -1.717 | 0.043 | 0.249 |
| RUNX1    | 1.428 | 0.015 | 0.237 | F12       | 2.260 | 0.028 | 0.237 | IL11      | 2.102  | 0.044 | 0.250 |
| C7       | 2.763 | 0.016 | 0.237 | TNFRSF13B | 2.412 | 0.028 | 0.237 | BTK       | 1.315  | 0.045 | 0.250 |
| AIRE     | 2.692 | 0.016 | 0.237 | CCR6      | 1.993 | 0.029 | 0.237 | IL17A     | 2.454  | 0.045 | 0.250 |
| MBL2     | 2.841 | 0.016 | 0.237 | IRGM      | 2.005 | 0.029 | 0.237 | ATF1      | 1.152  | 0.045 | 0.252 |
| ELANE    | 2.469 | 0.016 | 0.237 | POU2AF1   | 2.250 | 0.029 | 0.237 | CTAGE1    | 2.160  | 0.046 | 0.252 |
| SYCP1    | 2.625 | 0.016 | 0.237 | IL26      | 2.306 | 0.030 | 0.237 | PPARG     | 1.697  | 0.046 | 0.252 |
| ARG1     | 2.430 | 0.017 | 0.237 | DDX43     | 2.378 | 0.030 | 0.237 | S100A7    | 2.021  | 0.046 | 0.252 |
| CHIT1    | 2.500 | 0.017 | 0.237 | LILRA4    | 1.993 | 0.030 | 0.237 | RRAD      | 1.939  | 0.047 | 0.254 |
| ROPN1    | 2.473 | 0.017 | 0.237 | FOXP3     | 1.840 | 0.030 | 0.237 | CCL17     | 1.681  | 0.047 | 0.255 |
| LTK      | 2.486 | 0.017 | 0.237 | TNFRSF11A | 1.668 | 0.030 | 0.237 | MAP4K2    | 1.323  | 0.049 | 0.259 |
| IL22RA1  | 2.589 | 0.017 | 0.237 | TPTE      | 2.324 | 0.031 | 0.237 |           |        |       |       |

**Supplemental Table S12** Combined IPA of DE genes in early chemotherapy after one cycle of platinum-based chemotherapy identified the top canonical pathways in which these genes are involved

| Pathway                                                                                               | p-value   |
|-------------------------------------------------------------------------------------------------------|-----------|
| Role of cytokines in mediating communication between immune cells                                     | 1.50E-23  |
| Altered T cell and B cell signaling in rheumatoid arthritis                                           | 2.91 E-21 |
| Role of pattern recognition receptors in recognition of bacteria and viruses                          | 5.76E-20  |
| Hepatic cholestasis                                                                                   | 8.39E-20  |
| HMGB1 signaling                                                                                       | 5.50E-18  |
| Systemic Lupus Erythematosus In B Cell Signaling Pathway                                              | 1.26E-17  |
| Communication between Innate and Adaptive Immune Cells                                                | 1.58E-17  |
| Differential Regulation of Cytokine Production in Intestinal Epithelial Cells by IL-17A and IL-17F    | 3.98E-17  |
| Cardiac Hypertrophy Signaling (Enhanced)                                                              | 1E-16     |
| Differential Regulation of Cytokine Production in Macrophages and T Helper Cells by IL-17A and IL-17F | 3.16E-16  |



Supplemental Figure S1. Sensitivity analyses of DE genes with and without the inclusion of potential outliers. (A) Heat map of log2FC of IP fluid DE genes between early and late time points with and without P2 ( $p < 0.05$ ). (B) Heat map of log2FC of PBMC DE genes between early and late time points with and without P5 ( $p < 0.05$ ).

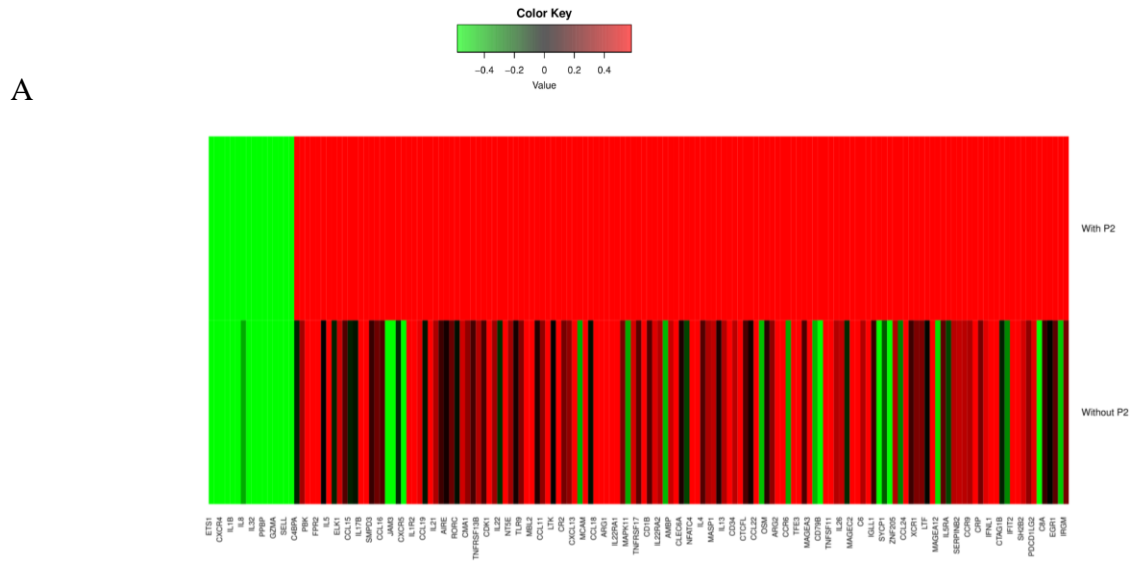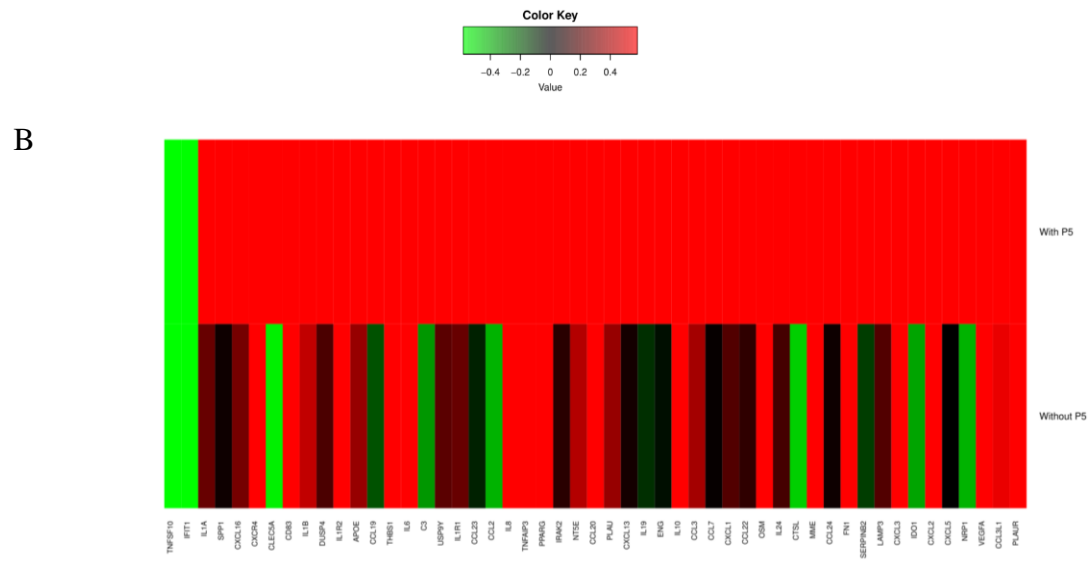

Supplement: s1 [file s1]
